# Supplementary material for: Impact of different cell penetrating peptides on the efficacy of antisense therapeutics for targeting intracellular pathogens
Source: PubMed Central journal article supplement (PMC4748415; doi:10.1038/srep20832), 2016-02-10
Supplement: srep20832-s1.pdf [file srep20832-s1.pdf]

## **Impact of different cell penetrating peptides on the efficacy of antisense therapeutics for targeting intracellular pathogens**

**Mostafa F.N. Abushahba<sup>1,2</sup>, Haroon Mohammad <sup>1</sup>, Shankar Thangamani<sup>1</sup>, Asmaa A. A. Hussein<sup>2</sup> and Mohamed N. Seleem<sup>1\*</sup>**

<sup>1</sup>Department of Comparative Pathobiology, College of Veterinary Medicine.

Purdue University, West Lafayette, Indiana, USA, 47907.

<sup>2</sup>Department of Animal Hygiene and Zoonoses, Faculty of Veterinary Medicine,

Assiut University, Assiut, Egypt.

\*Corresponding author: Mohamed N. Seleem. Email: [mseleem@purdue.edu](mailto:mseleem@purdue.edu)

**Table S1: Bacterial isolates used for this study:**

| <b>Bacterial isolate</b>                                         | <b>Description</b>                                                                                                     |
|------------------------------------------------------------------|------------------------------------------------------------------------------------------------------------------------|
| <i>L. monocytogenes</i> F4244                                    | Invasive strain F4244 CDC. Clinical isolate from patient's cerebrospinal fluid (CSF)                                   |
| <i>L. monocytogenes</i> J0161                                    | Isolated from a case of human listeriosis linked to a multi-state outbreak from a turkey processing plant, USA. (2000) |
| <i>L. monocytogenes</i> ATCC 13932                               | Clinical isolate from cerebrospinal fluid of child with meningitis, Germany                                            |
| <i>L. monocytogenes</i> ATCC 19112                               | Clinical isolate from patient's cerebrospinal fluid, Scotland (1935)                                                   |
| <i>L. monocytogenes</i> ATCC 19111                               | Isolated from poultry, England (1937)                                                                                  |
| <i>L. monocytogenes</i> ATCC 19114                               | Isolated from bovine brain, USA (1931)                                                                                 |
| <i>Methicillin-resistant Staphylococcus aureus</i> (MRSA) USA300 | Isolated from a wound in Mississippi, USA. Resistant to erythromycin, methicillin and tetracycline                     |
| <i>Escherichia coli</i> OP50                                     | Uracil auxotroph strain with limited growth on nematode growth medium                                                  |

**Table S2: The targeted sequence of the *rpoA* gene for six clinical strains of *L. monocytogenes*.**

| <b>Strain</b>                      | <b>Sequence (5'-3')</b>              |
|------------------------------------|--------------------------------------|
| <i>L. monocytogenes</i> F4244      | AAGGAGGGTAAATTTGAATGATCGAAATTGAAAAGC |
| <i>L. monocytogenes</i> J0161      | AAGGAGGGTAAATTTGAATGATCGAAATTGAAAAGC |
| <i>L. monocytogenes</i> ATCC 13932 | AAGGAGGGTAAATTTGAATGATCGAAATTGAAAAGC |
| <i>L. monocytogenes</i> ATCC 19112 | AAGGAGGGTAAATTTGAATGATCGAAATTGAAAAGC |
| <i>L. monocytogenes</i> ATCC 19111 | AAGGAGGGTAAATTTGAATGATCGAAATTGAAAAGC |
| <i>L. monocytogenes</i> ATCC 19114 | AAGGAGGGTAAATTTGAATGATCGAAATTGAAAAGC |

**Table S3. Sequence alignment of *rpoA* 5' terminal region among different *Listeria* species**

| Organism                             | Source                      | Locus tag     | Identity <sup>a</sup> | Sequence (5'-3') <sup>b</sup>                  |
|--------------------------------------|-----------------------------|---------------|-----------------------|------------------------------------------------|
| <b><i>Listeria monocytogenes</i></b> |                             |               |                       |                                                |
| J0161                                | Human CSF                   | LMOG_01906    | 100%                  | GAGGGTAAATTT <b><u>GAATGATCG</u></b> AAATTGAAA |
| EGD-e                                | Rabbit, England             | lmo2606       | 99%                   | GAGGGTAAATTT <b><u>GAATGATCG</u></b> AAATTGAAA |
| 10403S                               | Human skin lesion, USA      | LMRG_02150    | 99%                   | GAGGGTAAATTT <b><u>GAATGATCG</u></b> AAATTGAAA |
| 07PF0776                             | Cardiac abscess, human, USA | MUO_13015     | 95%                   | GAGGGTAAATTT <b><u>GAATGATCG</u></b> AAATTGAAA |
| F2365                                | Cheese, USA                 | LMOf2365_2579 | 95%                   | GAGGGTAAATTT <b><u>GAATGATCG</u></b> AAATTGAAA |
| HCC23                                | Channel catfish             | LMHCC_2928    | 94%                   | GAGGGTAAATTT <b><u>GAATGATCG</u></b> AAATTGAAA |
| M7                                   | Cow's milk, China           | LMM7_2718     | 94%                   | GAGGGTAAATTT <b><u>GAATGATCG</u></b> AAATTGAAA |
| <b><i>Listeria innocua</i></b>       |                             |               |                       |                                                |
| Clip11262                            | Food, Morocco               | lin2755       | 87%                   | GAGGGTAAATTT <b><u>GAATGATCG</u></b> AAATTGAAA |
| <b><i>Listeria ivanovii</i></b>      |                             |               |                       |                                                |
| PAM 55                               | Sheep, Spain                | LIV_2517      | 84%                   | GAGGGTAAATTT <b><u>GAATGATCG</u></b> AAATTGAAA |
| <b><i>Listeria welshimeri</i></b>    |                             |               |                       |                                                |
| SLCC5334                             | Decaying vegetation, USA    | lwe2556       | 86%                   | GAGGGTAAATTT <b><u>GAATGATCG</u></b> AAATTGAAA |
| <b><i>Listeria seeligeri</i></b>     |                             |               |                       |                                                |
| SLCC3954                             | Soil, Germany               | lse_2511      | 84%                   | GAGGGTAAATTT <b><u>GAATGATCG</u></b> AAATTGAAA |

<sup>a</sup> The identities between different *Listeria* strains were determined by using BLAST (Basic Local Alignment Search Tool).

<sup>b</sup> *rpoA* gene 5' terminal region among *Listeria* species showing the targeted area of interest in boldface type and the start codon ATG is bold and underlined.

**Table S4: Effect of PNAs on pure culture of *L. monocytogenes* F4244**

| PNA Concentrations |            |                   |            |                   |            |                   |            |                   |            |                   |            |                   |
|--------------------|------------|-------------------|------------|-------------------|------------|-------------------|------------|-------------------|------------|-------------------|------------|-------------------|
| PNA                | 1 µM       |                   | 2 µM       |                   | 4 µM       |                   | 8 µM       |                   | 16 µM      |                   | 32 µM      |                   |
|                    | Log CFU/ml | Log CFU reduction | Log CFU/ml | Log CFU reduction | Log CFU/ml | Log CFU reduction | Log CFU/ml | Log CFU reduction | Log CFU/ml | Log CFU reduction | Log CFU/ml | Log CFU reduction |
| <b>PKFF</b>        | 9.40±0.08  | -0.009            | 9.35±0.05  | 0.041             | 9.26±0.07  | 0.129             | 8.93±0.35  | 0.46              | 8.40±0.16  | 0.98*             | 6.63±0.59  | 2.78*             |
| <b>PANT</b>        | 9.30±0.06  | 0.095             | 9.27±0.21  | 0.119             | 9.14±0.05  | 0.25              | 8.09±0.95  | 1.30*             | 6.73±0.48  | 2.66*             | Cleared    | 9.39*             |
| <b>PTAT</b>        | 8.28±0.37  | 1.1*              | 5.94±0.42  | 3.45*             | Cleared    | 9.39*             | Cleared    | 9.39*             | Cleared    | 9.39*             | Cleared    | 9.39*             |
| <b>PRXR</b>        | 6.87±0.84  | 2.51*             | 3.15±0.21  | 6.24*             | Cleared    | 9.39*             | Cleared    | 9.39*             | Cleared    | 9.39*             | Cleared    | 9.39*             |
| <b>PRFR</b>        | 9.26±0.09  | 0.13              | 7.48±0.69  | 1.91*             | 6.10±0.63  | 3.29*             | Cleared    | 9.39*             | Cleared    | 9.39*             | Cleared    | 9.39*             |
| <b>Control</b>     | 9.39±0.04  | 0                 |            |                   |            |                   |            |                   |            |                   |            |                   |

Asterisks indicate values found to be significantly different from water by statistical analysis.

**Table S5: Selected genes used for this study and their proposed function**

| <b>Gene</b>     | <b>Locus tag</b> | <b>Proposed function</b>                                                                                                                                                                                                                                                                        |
|-----------------|------------------|-------------------------------------------------------------------------------------------------------------------------------------------------------------------------------------------------------------------------------------------------------------------------------------------------|
| <i>rpoA</i>     | lmo2606          | DNA-dependent RNA polymerase catalyzes the transcription of DNA into RNA using the four ribonucleoside triphosphates as substrates [1]                                                                                                                                                          |
| <i>hly</i>      | lmo0202          | Encodes Listeriolysin O (LLO), a sulfhydryl-activated toxin that causes cytolysis by forming pores in cholesterol-containing host membranes [2]                                                                                                                                                 |
| <i>plcA</i>     | lmo0201          | Encodes phosphatidylinositol-specific phospholipase C (PI-PLC) which cleaves glycosylphosphatidylinositol (GPI) and phosphatidylinositol (PI) anchors but not PI phosphates. Important factor in Listeria pathogenesis that works in conjunction with LLO lyse vacuoles inside host cells [3-6] |
| <i>plcB</i>     | lmo0205          | Encodes phosphatidylcholine-phospholipase C (PC-PLC) which plays an important role in the infection process. It assists LLO in efficient lysis of the two-membrane vacuoles that surround the bacteria after direct cell-to-cell spread [3-5, 7]                                                |
| <i>16s rRNA</i> | M645_14975       | Housekeeping gene [34, 35]                                                                                                                                                                                                                                                                      |

**Table S6: Effect of PNAs on growth of *L. monocytogenes* J0161 in infected *C. elegans*.**

| Treatment         | Concentrations  |                    |                 |                    |
|-------------------|-----------------|--------------------|-----------------|--------------------|
|                   | 16 $\mu$ M      |                    | 32 $\mu$ M      |                    |
|                   | Log CFUs/worm   | Log CFUs reduction | Log CFUs/worm   | Log CFUs reduction |
| <b>PKFF</b>       | 3.43 $\pm$ 0.2  | 0.71*              | 3.35 $\pm$ 0.25 | 1.03*              |
| <b>PANT</b>       | 3.88 $\pm$ 0.15 | 0.27               | 2.49 $\pm$ 0.48 | 1.89*              |
| <b>PTAT</b>       | 3.04 $\pm$ 0.36 | 1.11*              | 1.7 $\pm$ 0.6   | 2.67*              |
| <b>PRXR</b>       | 2.24 $\pm$ 0.99 | 1.91*              | 0               | 4.38*              |
| <b>PRFR</b>       | 2.85 $\pm$ 0.60 | 1.3*               | 1.86 $\pm$ 0.26 | 2.52*              |
| <b>Free PNA</b>   | 4.29 $\pm$ 0.17 | -0.13              | 4.39 $\pm$ 0.18 | -0.012             |
| <b>Gentamicin</b> | 3.52 $\pm$ 0.55 | 0.63*              | 2.18 $\pm$ 0.6  | 2.2*               |
| <b>Water</b>      | 4.15 $\pm$ 0.06 | 0                  | 4.38 $\pm$ 0.12 | 0                  |

Asterisks indicate values found to be significantly different from water by statistical analysis.

**Table S7: Primers used in this study**

| <b>Primer name</b> | <b>Target gene</b> | <b>Sequence (5'-3')</b>  | <b>Amplicon size (bp)</b> |
|--------------------|--------------------|--------------------------|---------------------------|
| RpoA-seqF          | <i>rpoA</i>        | ACAAGCAGCTGGTCTTGAAGTAAC | 386                       |
| RpoA-seqR          | <i>rpoA</i>        | ACCTTCAATTACAGAAAACATG   |                           |
| RpoA-F             | <i>rpoA</i>        | GTCCTGGTGTAGTAACTGCAG    | 145                       |
| RpoA-R             | <i>rpoA</i>        | GCAGGTGTGTAACCACGACC     |                           |
| Hly-F              | <i>hly</i>         | CATGGCACCACCAGCATCTC     | 136                       |
| Hly-R              | <i>hly</i>         | CACTGCATCTCCGTGGTATAC    |                           |
| PlcA-F             | <i>plcA</i>        | CAAGATGACTACAATGGTCCG    | 149                       |
| PlcA-R             | <i>plcA</i>        | GCTGCAGCATACTGACGAGG     |                           |
| PlcB-F             | <i>plcB</i>        | ATCGGTGACTGATTACCGAG     | 147                       |
| PlcB-R             | <i>plcB</i>        | TATGCACAGTGGTAGCCTGG     |                           |
| HK-F               | <i>16s rRNA</i>    | GCCTACCAAGGCAACGATGC     | 145                       |
| HK-R               | <i>16s rRNA</i>    | CATACACGCGGCGTTGCTC      |                           |
